## Correction

# Correction: Structure-Based Druggability Assessment of the Mammalian Structural Proteome with Inclusion of Light Protein Flexibility

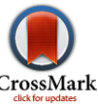

The PLOS Computational Biology Staff

A number of figure legends are associated with the wrong figures in the published article.

The legend of Figure 6 should be associated with Figure 4.

The legend of Figure 4 should be associated with Figure 5.

The legend of Figure 5 should be associated with Figure 6.

## Reference

1. Loving KA, Lin A, Cheng AC (2014) Structure-Based Druggability Assessment of the Mammalian Structural Proteome with Inclusion of Light Protein Flexibility. PLoS Comput Biol 10(7): e1003741. doi:10.1371/journal.pcbi.1003741

**Citation:** The PLOS Computational Biology Staff (2014) Correction: Structure-Based Druggability Assessment of the Mammalian Structural Proteome with Inclusion of Light Protein Flexibility. PLoS Comput Biol 10(9): e1003875. doi:10.1371/journal.pcbi.1003875

**Published:** September 9, 2014

**Copyright:** © 2014 The PLOS Computational Biology Staff. This is an open-access article distributed under the terms of the Creative Commons Attribution License, which permits unrestricted use, distribution, and reproduction in any medium, provided the original author and source are credited.
